# Supplementary material for: Toward Stability Enhancement of NTS1R-Targeted Radioligands: Structural Interventions on [99mTc]Tc-DT1
Source: MDPI journal article supplement (doi:10.3390/pharmaceutics15082092), 2023-08-07
Supplement: s1 [file s1]

## Article

# Supplementary Materials: Toward Stability Enhancement of NTS<sub>1</sub>R-Targeted Radioligands: Structural Interventions on [<sup>99m</sup>Tc]Tc-DT1

Panagiotis Kanellopoulos <sup>1</sup>, Berthold A. Nock <sup>1</sup>, Eric P. Krenning <sup>2</sup> and Theodosia Maina <sup>1,\*</sup>

## Analytical data for DT7, DT8 and DT9

Analytical data for the DT1 (N<sub>4</sub>-Gly<sup>7</sup>-Arg-Arg-Pro-Tyr-Ile-Leu-OH; N<sub>4</sub>, 6-(carboxy)-1,4,8,11-tetraazaundecane) mimics DT7 ([DAsn<sup>14</sup>]DT1), DT8 ([β-Homoleucine<sup>13</sup>]DT1) and DT9 ([[(palmitoyl)Lys<sup>7</sup>]DT1) from PiChem Forschungs- und Entwicklungs GmbH (Raaba-Grambach, Austria), comprising purity via HPLC analysis and MALDI-TOF data is summarized in Table S1.

**Table S1.** Analytical data for DT7, DT8 and DT9.<sup>a</sup>

|     | HPLC                        |                   |                  |                  | MW <sup>d</sup> calcd | MW found <sup>e</sup> , m/z |
|-----|-----------------------------|-------------------|------------------|------------------|-----------------------|-----------------------------|
|     | <i>t</i> <sub>R</sub> (min) |                   | % Purity         |                  |                       |                             |
| DT7 | 13.7 <sup>a</sup>           | 17.1 <sup>c</sup> | >95 <sup>a</sup> | >99 <sup>c</sup> | 1174.4                | 1175.2                      |
| DT8 | 8.7 <sup>b</sup>            | 19.1 <sup>c</sup> | >95 <sup>b</sup> | >99 <sup>c</sup> | 1076.3                | 1076.2                      |
| DT9 | 19.2 <sup>a</sup>           | 37.7 <sup>c</sup> | >90 <sup>a</sup> | >99 <sup>c</sup> | 1367.8                | 1368.8                      |

<sup>a</sup> A Nucleosil C18 (5 μm, 4 mm × 150 mm) column (MACHEREY-NAGEL GmbH & Co. KG; Dueren, Germany) was eluted at 1 mL/min flow rate with the following gradient: 90%A/10%B to 50%A/50%B in 30 min, UV trace at 215 nm, while in <sup>b</sup> 90%A/10%B to 10%A/90%B in 50 min was applied; A: 0.1% TFA, B: 0.1%TFA in MeCN. In an additional analysis system, a Waters Symmetry Shield RP-18 (5 μm, 4.6 mm × 150 mm) cartridge column (Waters, Vienna, Austria) was eluted at a 1 mL/min flow rate with the following linear gradient: from 100%A/0%B to 40%A/60%B in 60 min; A = 0.01% TFA and B = MeCN – UV trace at 220 nm; <sup>d</sup> average mass; <sup>e</sup> verification on MALDI TOF mass spectrometry.
